# Supplementary material
Source: publisher figshare collection journal article supplement (https://diabetesjournals.figshare.com/articles/dataset/_/17072708)
Supplement: Supplementary file 1 [file 31566410]

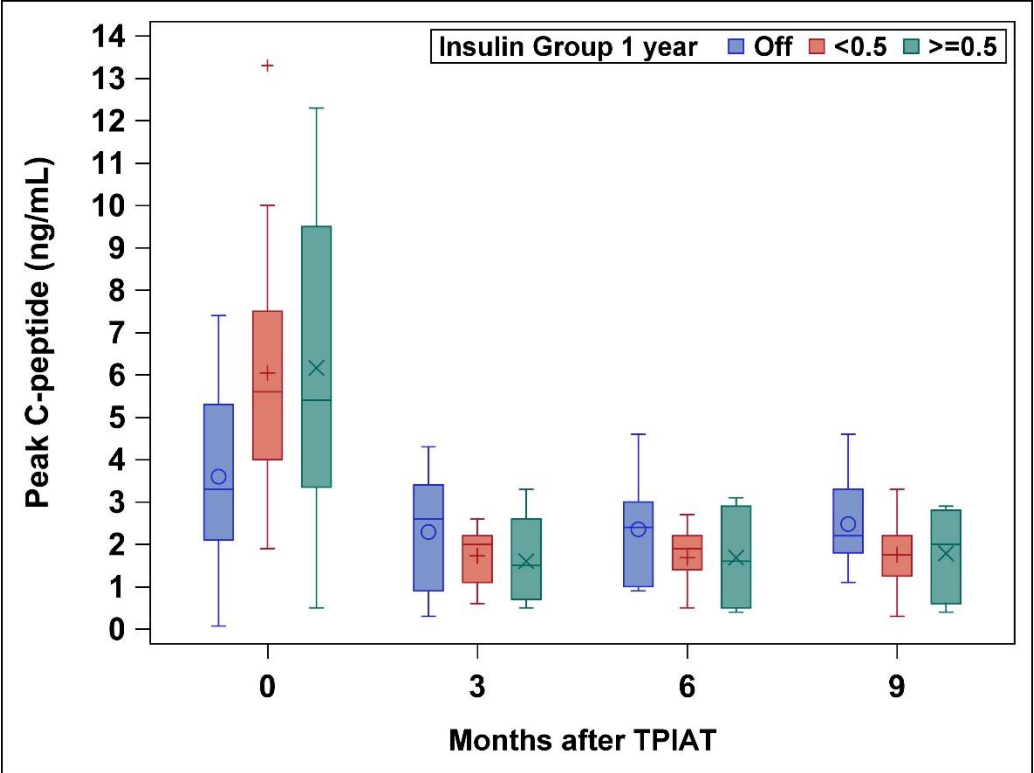

Supplemental Figure 1. Peak C-peptide values at all time points for insulin groups at one year after TPIAT.

|                         | <b>β estimate</b> | <b>SE</b> | <b>Odds Ratio (95% CL)</b> | <b>P-value</b> |
|-------------------------|-------------------|-----------|----------------------------|----------------|
| <b>3 months</b>         |                   |           |                            |                |
| TPIAT age (years)       | 0.24              | 0.09      | 1.27 (1.07-1.52)           | <b>0.007</b>   |
| BMI percentile at visit | 0.04              | 0.01      | 1.04 (1.01-1.07)           | <b>0.01</b>    |
| Peak C-peptide (ng/mL)  | -1.09             | 0.39      | 0.34 (0.15-0.73)           | <b>0.006</b>   |
| <b>6 months</b>         |                   |           |                            |                |
| TPIAT age (years)       | 0.15              | 0.09      | 1.16 (0.97-1.38)           | 0.10           |
| BMI percentile at visit | 0.03              | 0.02      | 1.03 (1.00-1.06)           | <b>0.049</b>   |
| Peak C-peptide (ng/mL)  | -0.86             | 0.40      | 0.42 (0.19-0.93)           | <b>0.03</b>    |
| <b>9 months</b>         |                   |           |                            |                |
| TPIAT age (years)       | 0.14              | 0.09      | 1.15 (0.97-1.36)           | 0.12           |
| BMI percentile at visit | 0.04              | 0.02      | 1.04 (1.01-1.07)           | <b>0.02</b>    |
| Peak C-peptide (ng/mL)  | -0.77             | 0.40      | 0.46 (0.21-1.02)           | 0.056          |

Supplemental Table 1. Final multivariable models for insulin group at 1 year (off, low, high).

| <b><math>\beta</math>-cell graft functional status</b> | <b>Off insulin<br/>N=12</b> | <b>&lt;0.5 TDD/kg<br/>N=21</b> | <b><math>\geq 0.5</math> TDD/kg<br/>N=8</b> |
|--------------------------------------------------------|-----------------------------|--------------------------------|---------------------------------------------|
| <b>Optimal</b>                                         | 12 (100%)                   | 0 (0%)                         | 0 (0%)                                      |
| <b>Good</b>                                            | 0 (0%)                      | 10 (48%)                       | 3 (37.5%)                                   |
| <b>Marginal</b>                                        | 0 (0%)                      | 8 (38%)                        | 2 (25%)                                     |
| <b>Failure</b>                                         | 0 (0%)                      | 3 (14%)                        | 3 (37.5%)                                   |

Supplemental Table 2. Igls graft outcomes and insulin outcomes at one year after TPIAT.
